# Supplementary material for: Towards greener stone shot and stone wool materials: binder systems based on gelatine modified with tannin or transglutaminase
Source: Royal Society of Chemistry journal article supplement (doi:10.1039/c8gc02021c), 2018-01-01

# Towards greener stone shot and stone wool materials: Binder systems based on gelatine modified with tannin or transglutaminase

**Thomas Hjelmgaard,\* Peter Anker Thorsen, Jesper Asgaard Bøtner, Josefine Kaurin, Carina Michella Schmücker and Lars Nærum**

ROCKWOOL International A/S, Hovedgaden 584, Entrance C, 2640 Hedehusene, Denmark

\* Email: [thomas.hjelmgaard@rockwool.com](mailto:thomas.hjelmgaard@rockwool.com)

## Contents

S2-S7: Details on experimental procedures for binder compositions

S8-S13: Detailed results for composite bars

S14: Large versions of Figure 2A-F

S15: Large versions of Figure 3A-C

S16-S19: Large versions of images in Figure 4

S20-S21: Large versions of images in Figure 5

S22: Large version of image in the right side of the table of contents entry

### Mixing of binder compositions comprising IMAGEL® RL modified with chestnut tree tannin in the presence of sodium hydroxide

Using procedures analogous to the representative example detailed above, the following binder compositions were mixed:

| Entry                                                                          | 1              | 2              | 3              | 4              | 5              | 6              | 7              |
|--------------------------------------------------------------------------------|----------------|----------------|----------------|----------------|----------------|----------------|----------------|
| <b>Binder composition</b>                                                      |                |                |                |                |                |                |                |
| IMAGEL® RL                                                                     | 100            | 100            | 100            | 100            | 100            | 100            | 100            |
| Chestnut tree tannin (%-wt. of gelatine)                                       | 0              | 3              | 5              | 10             | 20             | 30             | 50             |
| <b>Mixing of binder composition</b>                                            |                |                |                |                |                |                |                |
| IMAGEL® RL (g)                                                                 | 12.00          | 12.00          | 12.00          | 12.00          | 12.00          | 11.00          | 9.50           |
| Water (g)                                                                      | 63.95          | 64.92          | 65.42          | 67.47          | 71.33          | 68.71          | 65.3           |
| 1M NaOH (g)                                                                    | 5.67           | 5.67           | 5.67           | 5.67           | 5.67           | 5.20           | 4.60           |
| pH                                                                             | 9.1            | 9.1            | 9.1            | 9.1            | 9.1            | 9.1            | 9.1            |
| Chestnut tree tannin solution (g)                                              | 0              | 1.62           | 2.70           | 5.40           | 10.80          | 14.85          | 21.38          |
| pH                                                                             | -              | 9.1            | 9.1            | 9.0            | 9.1            | 9.1            | 9.1            |
| <b>Calculated binder composition</b>                                           |                |                |                |                |                |                |                |
| Binder concentration (%-wt. in water)                                          | 15.0           | 15.0           | 15.0           | 15.0           | 15.0           | 15.0           | 14.0           |
| IMAGEL® RL (%-wt. of gelatine/<br>%-wt. of all non-water components)           | 100.0/<br>98.2 | 100.0/<br>95.0 | 100.0/<br>93.0 | 100.0/<br>88.4 | 100.0/<br>80.3 | 100.0/<br>73.6 | 100.0/<br>63.1 |
| Chestnut tree tannin (%-wt. of gelatine/<br>%-wt. of all non-water components) | 0/<br>0        | 3.0/<br>2.9    | 5.0/<br>4.7    | 10.0/<br>8.8   | 20.0/<br>16.1  | 30.0/<br>22.1  | 50.0/<br>31.5  |
| NaOH (%-wt. of gelatine/<br>%-wt. of all non-water components)                 | 1.8/<br>1.8    | 2.2/<br>2.1    | 2.5/<br>2.3    | 3.2/<br>2.8    | 4.5/<br>3.6    | 5.9/<br>4.3    | 8.6/<br>5.4    |

**Mixing of binder compositions comprising IMAGEL® LA modified with chestnut tree tannin in the presence of sodium hydroxide**

Using procedures analogous to the representative example detailed above, the following binder compositions were mixed:

| <b>Entry</b>                                                                   | <b>1</b>       | <b>2</b>       | <b>3</b>       | <b>4</b>       | <b>5</b>       | <b>6</b>       | <b>7</b>       |
|--------------------------------------------------------------------------------|----------------|----------------|----------------|----------------|----------------|----------------|----------------|
| <b>Binder composition</b>                                                      |                |                |                |                |                |                |                |
| IMAGEL® LA                                                                     | 100            | 100            | 100            | 100            | 100            | 100            | 100            |
| Chestnut tree tannin (%-wt. of gelatine)                                       | 0              | 3              | 5              | 10             | 20             | 30             | 50             |
| <b>Mixing of binder composition</b>                                            |                |                |                |                |                |                |                |
| IMAGEL® LA (g)                                                                 | 14.00          | 12.00          | 12.00          | 12.00          | 12.00          | 11.00          | 9.50           |
| Water (g)                                                                      | 75.17          | 65.92          | 66.43          | 68.54          | 71.92          | 69.29          | 65.90          |
| 1M NaOH (g)                                                                    | 5.16           | 4.65           | 4.67           | 5.00           | 4.75           | 4.29           | 3.97           |
| pH                                                                             | 9.1            | 9.1            | 9.1            | 9.0            | 9.0            | 9.0            | 9.0            |
| Chestnut tree tannin solution (g)                                              | 0              | 1.62           | 2.70           | 5.40           | 10.80          | 14.85          | 21.38          |
| pH                                                                             | -              | 9.0            | 9.0            | 9.1            | 9.2            | 9.3            | 9.2            |
| <b>Calculated binder composition</b>                                           |                |                |                |                |                |                |                |
| Binder concentration (%-wt. in water)                                          | 15.1           | 15.0           | 15.0           | 14.9           | 15.0           | 15.0           | 14.9           |
| IMAGEL® LA (%-wt. of gelatine/<br>%-wt. of all non-water components)           | 100.0/<br>98.6 | 100.0/<br>95.3 | 100.0/<br>93.3 | 100.0/<br>88.5 | 100.0/<br>80.5 | 100.0/<br>73.8 | 100.0/<br>63.2 |
| Chestnut tree tannin (%-wt. of gelatine/<br>%-wt. of all non-water components) | 0/<br>0        | 3.0/<br>2.9    | 5.0/<br>4.7    | 10.0/<br>8.9   | 20.0/<br>16.1  | 30.0/<br>22.1  | 50.0/<br>31.6  |
| NaOH (%-wt. of gelatine/<br>%-wt. of all non-water components)                 | 1.4/<br>1.4    | 1.9/<br>1.8    | 2.2/<br>2.0    | 3.0/<br>2.6    | 4.2/<br>3.4    | 5.5/<br>4.1    | 8.3/<br>5.3    |

**Mixing of binder compositions comprising IMAGEL® RA modified with chestnut tree tannin in the presence of sodium hydroxide**

Using procedures analogous to the representative example detailed above, the following binder compositions were mixed:

| <b>Entry</b>                                                                   | <b>1</b>       | <b>2</b>       | <b>3</b>       | <b>4</b>       | <b>5</b>       | <b>6</b>       | <b>7</b>       |
|--------------------------------------------------------------------------------|----------------|----------------|----------------|----------------|----------------|----------------|----------------|
| <b>Binder composition</b>                                                      |                |                |                |                |                |                |                |
| IMAGEL® RA                                                                     | 100            | 100            | 100            | 100            | 100            | 100            | 100            |
| Chestnut tree tannin (%-wt. of gelatine)                                       | 0              | 3              | 5              | 10             | 20             | 30             | 50             |
| <b>Mixing of binder composition</b>                                            |                |                |                |                |                |                |                |
| IMAGEL® RA (g)                                                                 | 12.00          | 12.00          | 12.00          | 12.00          | 12.00          | 11.00          | 9.50           |
| Water (g)                                                                      | 65.42          | 66.43          | 66.95          | 68.54          | 72.51          | 69.88          | 65.90          |
| 1M NaOH (g)                                                                    | 3.81           | 3.81           | 3.81           | 3.81           | 3.81           | 3.73           | 3.13           |
| pH                                                                             | 9.1            | 9.3            | 9.2            | 9.3            | 9.2            | 9.0            | 9.0            |
| Chestnut tree tannin solution (g)                                              | 0              | 1.62           | 2.70           | 5.40           | 10.80          | 14.85          | 21.38          |
| pH                                                                             | -              | 9.3            | 9.2            | 9.3            | 9.3            | 9.2            | 9.1            |
| <b>Calculated binder composition</b>                                           |                |                |                |                |                |                |                |
| Binder concentration (%-wt. in water)                                          | 15.0           | 15.0           | 15.0           | 15.1           | 15.0           | 15.0           | 15.0           |
| IMAGEL® RA (%-wt. of gelatine/<br>%-wt. of all non-water components)           | 100.0/<br>98.8 | 100.0/<br>95.6 | 100.0/<br>93.5 | 100.0/<br>88.8 | 100.0/<br>80.7 | 100.0/<br>73.9 | 100.0/<br>63.3 |
| Chestnut tree tannin (%-wt. of gelatine/<br>%-wt. of all non-water components) | 0/<br>0        | 3.0/<br>2.9    | 5.0/<br>4.7    | 10.0/<br>8.9   | 20.0/<br>16.1  | 30.0/<br>22.2  | 50.0/<br>31.6  |
| NaOH (%-wt. of gelatine/<br>%-wt. of all non-water components)                 | 1.2/<br>1.2    | 1.6/<br>1.6    | 1.9/<br>1.8    | 2.6/<br>2.3    | 3.9/<br>3.2    | 5.3/<br>4.0    | 8.0/<br>5.1    |

**Mixing of binder compositions comprising IMAGEL® AP modified with chestnut tree tannin in the presence of sodium hydroxide**

Using procedures analogous to the representative example detailed above, the following binder compositions were mixed:

| <b>Entry</b>                                                                   | <b>1</b>       | <b>2</b>       | <b>3</b>       | <b>4</b>       | <b>5</b>       | <b>6</b>       | <b>7</b>       |
|--------------------------------------------------------------------------------|----------------|----------------|----------------|----------------|----------------|----------------|----------------|
| <b>Binder composition</b>                                                      |                |                |                |                |                |                |                |
| IMAGEL® AP                                                                     | 100            | 100            | 100            | 100            | 100            | 100            | 100            |
| Chestnut tree tannin (%-wt. of gelatine)                                       | 0              | 3              | 5              | 10             | 20             | 30             | 50             |
| <b>Mixing of binder composition</b>                                            |                |                |                |                |                |                |                |
| IMAGEL® AP (g)                                                                 | 12.00          | 12.00          | 12.00          | 12.00          | 12.00          | 11.00          | 9.50           |
| Water (g)                                                                      | 65.42          | 66.95          | 67.47          | 69.08          | 73.11          | 70.48          | 66.50          |
| 1M NaOH (g)                                                                    | 3.14           | 3.14           | 3.14           | 3.14           | 3.14           | 2.87           | 2.49           |
| pH                                                                             | 9.3            | 9.2            | 9.3            | 9.3            | 9.2            | 9.2            | 9.3            |
| Chestnut tree tannin solution (g)                                              | 0              | 1.62           | 2.70           | 5.40           | 10.80          | 14.85          | 21.38          |
| pH                                                                             | -              | 9.2            | 9.3            | 9.3            | 9.3            | 9.3            | 9.3            |
| <b>Calculated binder composition</b>                                           |                |                |                |                |                |                |                |
| Binder concentration (%-wt. in water)                                          | 15.0           | 15.0           | 15.0           | 15.0           | 15.0           | 15.0           | 15.0           |
| IMAGEL® AP (%-wt. of gelatine/<br>%-wt. of all non-water components)           | 100.0/<br>99.0 | 100.0/<br>95.8 | 100.0/<br>93.7 | 100.0/<br>89.0 | 100.0/<br>80.8 | 100.0/<br>74.0 | 100.0/<br>63.4 |
| Chestnut tree tannin (%-wt. of gelatine/<br>%-wt. of all non-water components) | 0/<br>0        | 3.0/<br>2.9    | 5.0/<br>4.7    | 10.0/<br>8.9   | 20.0/<br>16.2  | 30.0/<br>22.2  | 50.0/<br>31.7  |
| NaOH (%-wt. of gelatine/<br>%-wt. of all non-water components)                 | 1.0/<br>1.0    | 1.4/<br>1.4    | 1.7/<br>1.6    | 2.4/<br>2.1    | 3.7/<br>3.0    | 5.0/<br>3.7    | 7.7/<br>4.9    |

### Mixing of binder compositions comprising IMAGEL® RA modified with TI transglutaminase

Using procedures analogous to the representative example detailed above, the following binder compositions were mixed:

| Entry                                                                         | 1               | 2              | 3              | 4              | 5              | 6              | 7              |
|-------------------------------------------------------------------------------|-----------------|----------------|----------------|----------------|----------------|----------------|----------------|
| <b>Binder composition</b>                                                     |                 |                |                |                |                |                |                |
| IMAGEL® RA                                                                    | 100             | 100            | 100            | 100            | 100            | 100            | 100            |
| TI transglutaminase (%-wt. of gelatine)                                       | 0               | 3              | 5              | 10             | 20             | 30             | 50             |
| <b>Mixing of binder composition</b>                                           |                 |                |                |                |                |                |                |
| IMAGEL® RA (g)                                                                | 12.00           | 14.00          | 13.00          | 12.50          | 12.00          | 11.00          | 9.50           |
| Water for gelatine (g)                                                        | 68.00           | 77.51          | 70.85          | 65.42          | 57.60          | 48.03          | 33.25          |
| TI transglutaminase (g)                                                       | 0               | 0.42           | 0.65           | 1.25           | 2.40           | 3.30           | 4.75           |
| Water for transglutaminase (g)                                                | 0               | 4.20           | 6.50           | 12.50          | 24.00          | 33.00          | 47.50          |
| pH                                                                            | 5.0             | 5.1            | 5.1            | 5.0            | 5.0            | 5.0            | 5.1            |
| <b>Calculated binder composition</b>                                          |                 |                |                |                |                |                |                |
| Binder concentration (%-wt. in water)                                         | 15.0            | 15.0           | 15.0           | 15.0           | 15.0           | 15.0           | 15.0           |
| IMAGEL® RA (%-wt. of gelatine/<br>%-wt. of all non-water components)          | 100.0/<br>100.0 | 100.0/<br>97.1 | 100.0/<br>95.2 | 100.0/<br>90.9 | 100.0/<br>83.3 | 100.0/<br>76.9 | 100.0/<br>66.7 |
| TI transglutaminase (%-wt. of gelatine/<br>%-wt. of all non-water components) | 0/<br>0         | 3.0/<br>2.9    | 5.0/<br>4.8    | 10.0/<br>9.1   | 20.0/<br>16.7  | 30.0/<br>23.1  | 50.0/<br>33.3  |

### Mixing of binder compositions comprising IMAGEL® AP modified with TI transglutaminase

Using procedures analogous to the representative example detailed above, the following binder compositions were mixed:

| Entry                                                                         | 1               | 2              | 3              | 4              | 5              | 6              | 7              |
|-------------------------------------------------------------------------------|-----------------|----------------|----------------|----------------|----------------|----------------|----------------|
| <b>Binder composition</b>                                                     |                 |                |                |                |                |                |                |
| IMAGEL® AP                                                                    | 100             | 100            | 100            | 100            | 100            | 100            | 100            |
| TI transglutaminase (%-wt. of gelatine)                                       | 0               | 3              | 5              | 10             | 20             | 30             | 50             |
| <b>Mixing of binder composition</b>                                           |                 |                |                |                |                |                |                |
| IMAGEL® AP (g)                                                                | 12.00           | 14.00          | 13.00          | 12.50          | 12.00          | 11.00          | 9.50           |
| Water for gelatine (g)                                                        | 68.00           | 77.51          | 70.85          | 65.42          | 57.60          | 48.03          | 33.25          |
| TI transglutaminase (g)                                                       | 0               | 0.42           | 0.65           | 1.25           | 2.40           | 3.30           | 4.75           |
| Water for transglutaminase (g)                                                | 0               | 4.20           | 6.50           | 12.50          | 24.00          | 33.00          | 47.50          |
| pH                                                                            | 4.6             | 4.7            | 4.7            | 4.7            | 4.5            | 4.8            | 4.8            |
| <b>Calculated binder composition</b>                                          |                 |                |                |                |                |                |                |
| Binder concentration (%-wt. in water)                                         | 15.0            | 15.0           | 15.0           | 15.0           | 15.0           | 15.0           | 15.0           |
| IMAGEL® AP (%-wt. of gelatine/<br>%-wt. of all non-water components)          | 100.0/<br>100.0 | 100.0/<br>97.1 | 100.0/<br>95.2 | 100.0/<br>90.9 | 100.0/<br>83.3 | 100.0/<br>76.9 | 100.0/<br>66.7 |
| TI transglutaminase (%-wt. of gelatine/<br>%-wt. of all non-water components) | 0/<br>0         | 3.0/<br>2.9    | 5.0/<br>4.8    | 10.0/<br>9.1   | 20.0/<br>16.7  | 30.0/<br>23.1  | 50.0/<br>33.3  |

## Results for binder compositions comprising IMAGEL® RL modified with chestnut tree tannin in the presence of sodium hydroxide

The table below lists the results obtained for binder compositions comprising IMAGEL® RL modified with chestnut tree tannin in the presence of sodium hydroxide.

| Entry                                                | 1     | 2     | 3     | 4     | 5     | 6     | 7     |
|------------------------------------------------------|-------|-------|-------|-------|-------|-------|-------|
| <b>Binder composition</b>                            |       |       |       |       |       |       |       |
| IMAGEL® RL                                           | 100   | 100   | 100   | 100   | 100   | 100   | 100   |
| Chestnut tree tannin (%-wt. of gelatine)             | 0     | 3     | 5     | 10    | 20    | 30    | 50    |
| <b>Composite bar results</b>                         |       |       |       |       |       |       |       |
| Avg. unaged mechanical strength (kN, n = 5)          | 0.151 | 0.182 | 0.198 | 0.209 | 0.143 | 0.092 | 0.061 |
| Standard error (kN)                                  | 0.007 | 0.018 | 0.019 | 0.018 | 0.011 | 0.006 | 0.004 |
| Binder content (%-wt of stone shots)                 | 2.78  | 2.80  | 2.76  | 2.77  | 2.74  | 2.70  | 2.62  |
| <hr/>                                                |       |       |       |       |       |       |       |
| Avg. autoclave aged mechanical strength (kN, n = 5)  | 0.098 | 0.129 | 0.146 | 0.142 | 0.112 | 0.088 | 0.062 |
| Standard error (kN)                                  | 0.005 | 0.008 | 0.007 | 0.009 | 0.009 | 0.005 | 0.005 |
| Binder content (%-wt of stone shots)                 | 2.74  | 2.72  | 2.71  | 2.69  | 2.64  | 2.61  | 2.49  |
| <hr/>                                                |       |       |       |       |       |       |       |
| Avg. water bath aged mechanical strength (kN, n = 5) | 0     | 0.133 | 0.153 | 0.145 | 0.095 | 0.074 | 0.041 |
| Standard error (kN)                                  | -     | 0.007 | 0.005 | 0.012 | 0.005 | 0.007 | 0.003 |
| Binder content (%-wt of stone shots)                 | 0     | 1.97  | 2.19  | 2.30  | 2.29  | 2.25  | 1.99  |

These data are shown in the figures below.

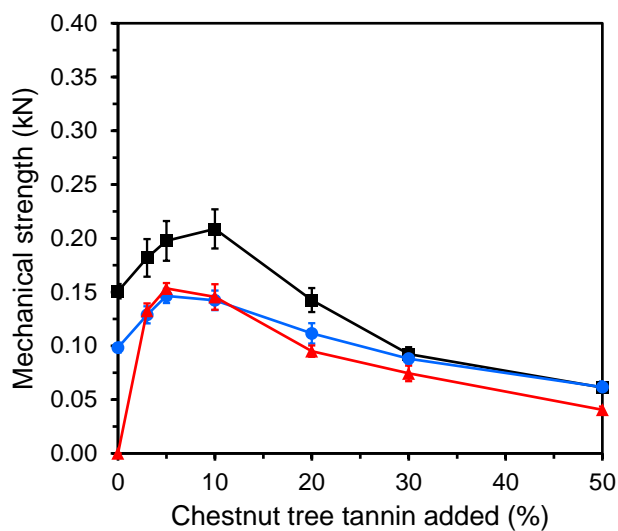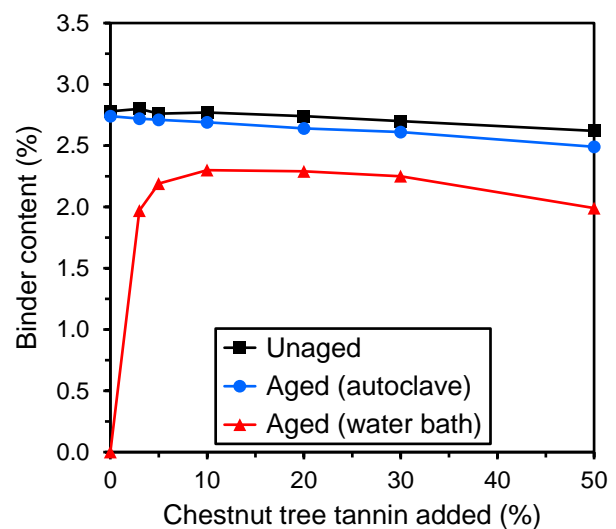



## Results for binder compositions comprising IMAGEL® LA modified with chestnut tree tannin in the presence of sodium hydroxide

The table below lists the results obtained for binder compositions comprising IMAGEL® LA modified with chestnut tree tannin in the presence of sodium hydroxide.

| Entry                                                | 1     | 2     | 3     | 4     | 5     | 6     | 7     |
|------------------------------------------------------|-------|-------|-------|-------|-------|-------|-------|
| <b>Binder composition</b>                            |       |       |       |       |       |       |       |
| IMAGEL® LA                                           | 100   | 100   | 100   | 100   | 100   | 100   | 100   |
| Chestnut tree tannin (%-wt. of gelatine)             | 0     | 3     | 5     | 10    | 20    | 30    | 50    |
| <b>Composite bar results</b>                         |       |       |       |       |       |       |       |
| Avg. unaged mechanical strength (kN, n = 5)          | 0.223 | 0.220 | 0.231 | 0.228 | 0.231 | 0.160 | 0.101 |
| Standard error (kN)                                  | 0.017 | 0.011 | 0.007 | 0.010 | 0.016 | 0.014 | 0.007 |
| Binder content (%-wt of stone shots)                 | 2.77  | 2.73  | 2.72  | 2.74  | 2.66  | 2.70  | 2.63  |
| Avg. autoclave aged mechanical strength (kN, n = 5)  | 0.204 | 0.196 | 0.219 | 0.220 | 0.218 | 0.194 | 0.147 |
| Standard error (kN)                                  | 0.019 | 0.013 | 0.019 | 0.013 | 0.013 | 0.015 | 0.014 |
| Binder content (%-wt of stone shots)                 | 2.75  | 2.68  | 2.69  | 2.70  | 2.63  | 2.65  | 2.57  |
| Avg. water bath aged mechanical strength (kN, n = 5) | 0     | 0.145 | 0.142 | 0.173 | 0.187 | 0.151 | 0.083 |
| Standard error (kN)                                  | -     | 0.013 | 0.010 | 0.007 | 0.011 | 0.006 | 0.009 |
| Binder content (%-wt of stone shots)                 | 0     | 2.09  | 2.38  | 2.47  | 2.42  | 2.40  | 2.24  |

These data are shown in the figures below.

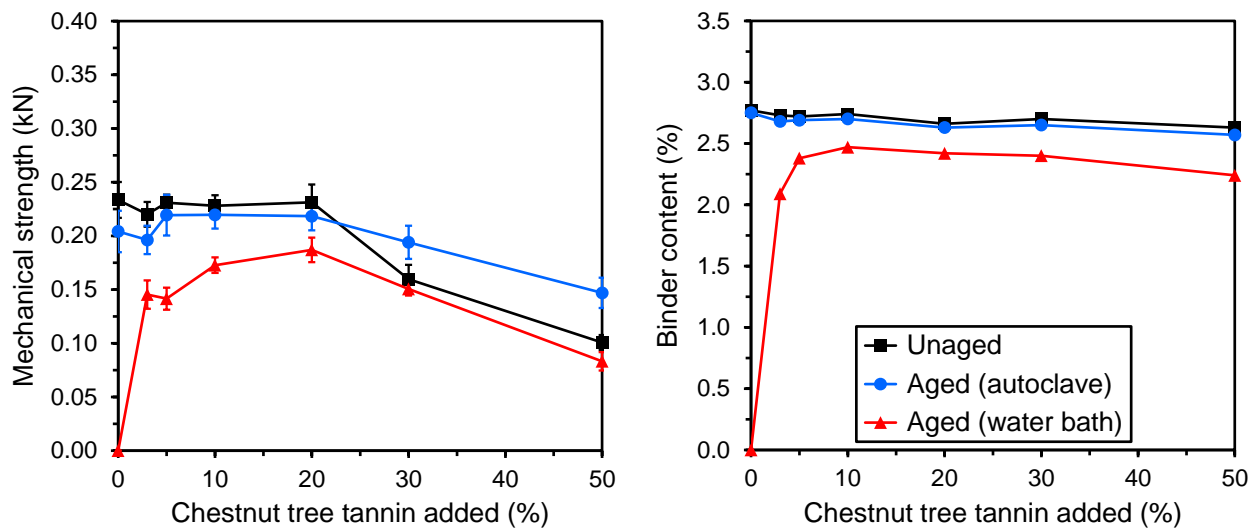

## Results for binder compositions comprising IMAGEL® RA modified with chestnut tree tannin in the presence of sodium hydroxide

The table below lists the results obtained for binder compositions comprising IMAGEL® RA modified with chestnut tree tannin in the presence of sodium hydroxide.

| Entry                                                | 1     | 2     | 3     | 4     | 5     | 6     | 7     |
|------------------------------------------------------|-------|-------|-------|-------|-------|-------|-------|
| <b>Binder composition</b>                            |       |       |       |       |       |       |       |
| IMAGEL® RA                                           | 100   | 100   | 100   | 100   | 100   | 100   | 100   |
| Chestnut tree tannin (%-wt. of gelatine)             | 0     | 3     | 5     | 10    | 20    | 30    | 50    |
| <b>Composite bar results</b>                         |       |       |       |       |       |       |       |
| Avg. unaged mechanical strength (kN, n = 5)          | 0.261 | 0.317 | 0.312 | 0.252 | 0.212 | 0.206 | 0.144 |
| Standard error (kN)                                  | 0.014 | 0.015 | 0.028 | 0.022 | 0.013 | 0.021 | 0.006 |
| Binder content (%-wt of stone shots)                 | 2.81  | 2.80  | 2.84  | 2.76  | 2.73  | 2.74  | 2.71  |
| Avg. autoclave aged mechanical strength (kN, n = 5)  | 0.264 | 0.239 | 0.217 | 0.232 | 0.217 | 0.225 | 0.165 |
| Standard error (kN)                                  | 0.008 | 0.013 | 0.010 | 0.013 | 0.011 | 0.009 | 0.011 |
| Binder content (%-wt of stone shots)                 | 2.83  | 2.81  | 2.82  | 2.79  | 2.73  | 2.68  | 2.63  |
| Avg. water bath aged mechanical strength (kN, n = 5) | 0     | 0.223 | 0.206 | 0.242 | 0.225 | 0.193 | 0.134 |
| Standard error (kN)                                  | -     | 0.011 | 0.016 | 0.020 | 0.017 | 0.016 | 0.013 |
| Binder content (%-wt of stone shots)                 | 0     | 2.63  | 2.70  | 2.68  | 2.67  | 2.55  | 2.44  |

These data are shown in the figures below.

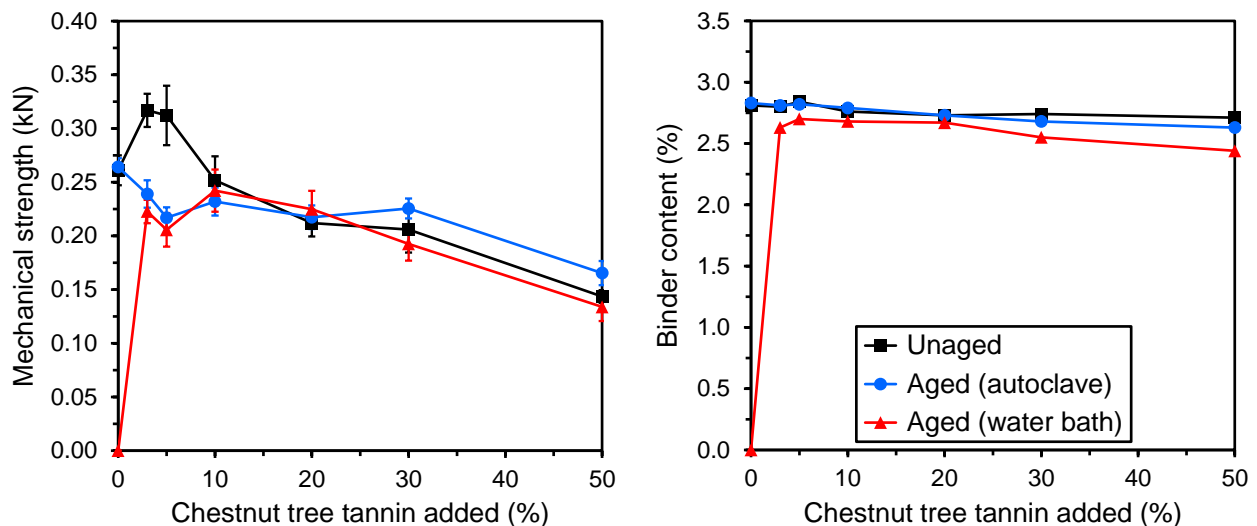

## Results for binder compositions comprising IMAGEL® AP modified with chestnut tree tannin in the presence of sodium hydroxide

The table below lists the results obtained for binder compositions comprising IMAGEL® AP modified with chestnut tree tannin in the presence of sodium hydroxide.

| Entry                                                | 1     | 2     | 3     | 4     | 5     | 6     | 7     |
|------------------------------------------------------|-------|-------|-------|-------|-------|-------|-------|
| <b>Binder composition</b>                            |       |       |       |       |       |       |       |
| IMAGEL® AP                                           | 100   | 100   | 100   | 100   | 100   | 100   | 100   |
| Chestnut tree tannin (%-wt. of gelatine)             | 0     | 3     | 5     | 10    | 20    | 30    | 50    |
| <b>Composite bar results</b>                         |       |       |       |       |       |       |       |
| Avg. unaged mechanical strength (kN, n = 5)          | 0.319 | 0.308 | 0.331 | 0.298 | 0.277 | 0.240 | 0.159 |
| Standard error (kN)                                  | 0.018 | 0.012 | 0.012 | 0.016 | 0.009 | 0.013 | 0.007 |
| Binder content (%-wt of stone shots)                 | 2.87  | 2.83  | 2.86  | 2.88  | 2.80  | 2.77  | 2.71  |
| Avg. autoclave aged mechanical strength (kN, n = 5)  | 0.333 | 0.314 | 0.304 | 0.267 | 0.209 | 0.199 | 0.174 |
| Standard error (kN)                                  | 0.021 | 0.015 | 0.023 | 0.013 | 0.016 | 0.008 | 0.010 |
| Binder content (%-wt of stone shots)                 | 2.85  | 2.82  | 2.76  | 2.78  | 2.76  | 2.73  | 2.71  |
| Avg. water bath aged mechanical strength (kN, n = 5) | 0     | 0.314 | 0.304 | 0.268 | 0.210 | 0.201 | 0.134 |
| Standard error (kN)                                  | -     | 0.030 | 0.011 | 0.005 | 0.010 | 0.004 | 0.006 |
| Binder content (%-wt of stone shots)                 | 0     | 2.75  | 2.73  | 2.77  | 2.67  | 2.68  | 2.43  |

These data are shown in the figures below.

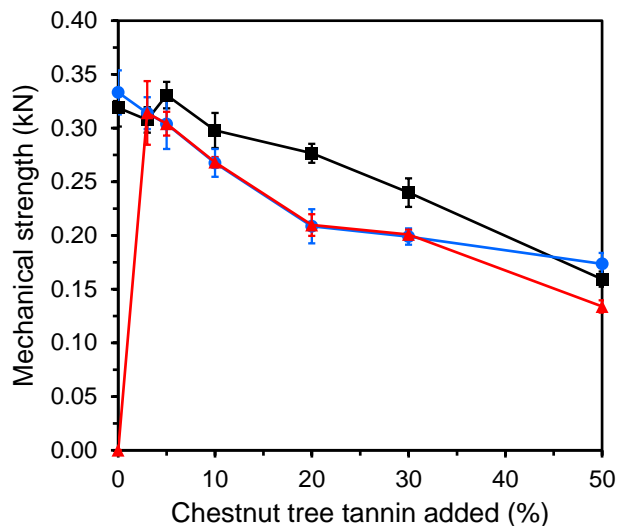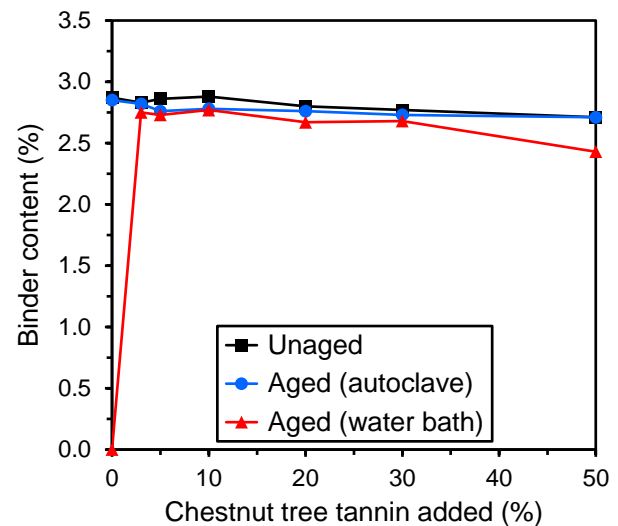

## Results for binder compositions comprising IMAGEL® RA modified with transglutaminase

The table below lists the results obtained for binder compositions comprising IMAGEL® RA modified with TI transglutaminase.

| Entry                                                | 1     | 2     | 3     | 4     | 5     | 6     | 7     |
|------------------------------------------------------|-------|-------|-------|-------|-------|-------|-------|
| <b>Binder composition</b>                            |       |       |       |       |       |       |       |
| IMAGEL® RA                                           | 100   | 100   | 100   | 100   | 100   | 100   | 100   |
| TI transglutaminase (%-wt. of gelatine)              | 0     | 3     | 5     | 10    | 20    | 30    | 50    |
| <b>Composite bar results</b>                         |       |       |       |       |       |       |       |
| Avg. unaged mechanical strength (kN, n = 5)          | 0.279 | 0.250 | 0.251 | 0.238 | 0.217 | 0.134 | 0.110 |
| Standard error (kN)                                  | 0.028 | 0.010 | 0.007 | 0.017 | 0.012 | 0.003 | 0.009 |
| Binder content (%-wt of stone shots)                 | 2.90  | 2.85  | 2.84  | 2.86  | 2.88  | 2.86  | 2.84  |
| Avg. autoclave aged mechanical strength (kN, n = 5)  | 0.270 | 0.309 | 0.269 | 0.226 | 0.173 | 0.102 | 0.084 |
| Standard error (kN)                                  | 0.010 | 0.023 | 0.011 | 0.023 | 0.015 | 0.004 | 0.002 |
| Binder content (%-wt of stone shots)                 | 2.90  | 2.83  | 2.81  | 2.82  | 2.82  | 2.89  | 2.89  |
| Avg. water bath aged mechanical strength (kN, n = 5) | 0     | 0.223 | 0.249 | 0.244 | 0.222 | 0.170 | 0.143 |
| Standard error (kN)                                  | -     | 0.021 | 0.017 | 0.021 | 0.013 | 0.014 | 0.005 |
| Binder content (%-wt of stone shots)                 | 0     | 2.41  | 2.54  | 2.60  | 2.59  | 2.47  | 2.38  |

These data are shown in the figures below.

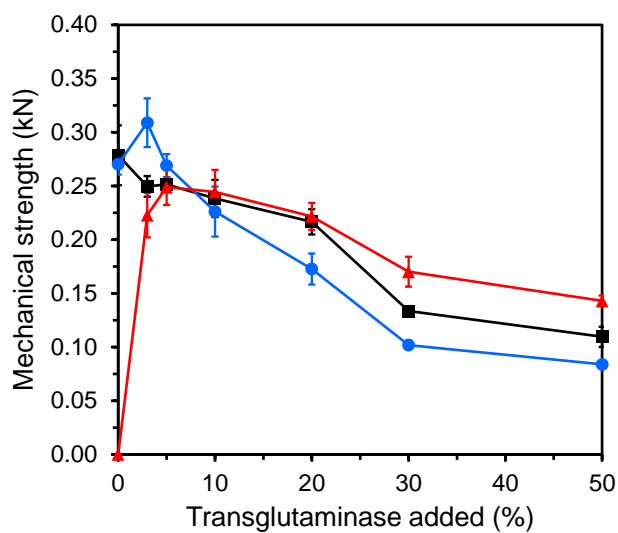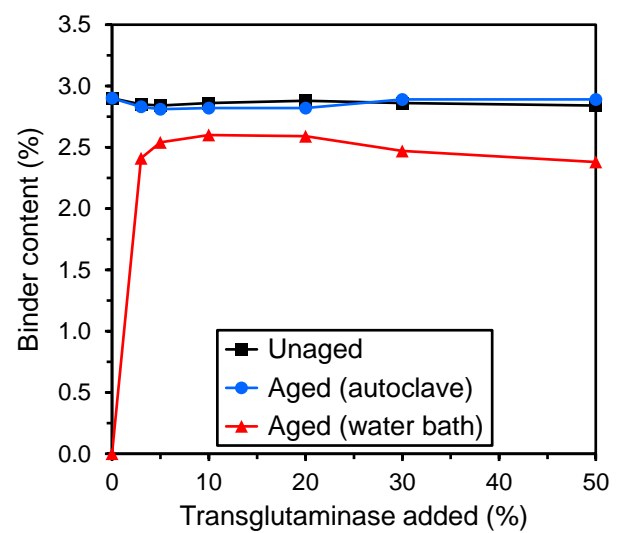

## Results for binder compositions comprising IMAGEL® AP modified with transglutaminase

The table below lists the results obtained for binder compositions comprising IMAGEL® AP modified with TI transglutaminase.

| Entry                                                | 1     | 2     | 3     | 4     | 5     | 6     | 7     |
|------------------------------------------------------|-------|-------|-------|-------|-------|-------|-------|
| <b>Binder composition</b>                            |       |       |       |       |       |       |       |
| IMAGEL® AP                                           | 100   | 100   | 100   | 100   | 100   | 100   | 100   |
| TI transglutaminase (%-wt. of gelatine)              | 0     | 3     | 5     | 10    | 20    | 30    | 50    |
| <b>Composite bar results</b>                         |       |       |       |       |       |       |       |
| Avg. unaged mechanical strength (kN, n = 5)          | 0.321 | 0.322 | 0.319 | 0.308 | 0.280 | 0.246 | 0.239 |
| Standard error (kN)                                  | 0.011 | 0.021 | 0.018 | 0.011 | 0.012 | 0.014 | 0.015 |
| Binder content (%-wt of stone shots)                 | 2.91  | 2.89  | 2.88  | 2.86  | 2.86  | 2.86  | 2.83  |
| Avg. autoclave aged mechanical strength (kN, n = 5)  | 0.338 | 0.346 | 0.257 | 0.186 | 0.148 | 0.137 | 0.125 |
| Standard error (kN)                                  | 0.031 | 0.011 | 0.019 | 0.010 | 0.005 | 0.012 | 0.013 |
| Binder content (%-wt of stone shots)                 | 2.88  | 2.87  | 2.86  | 2.84  | 2.80  | 2.80  | 2.85  |
| Avg. water bath aged mechanical strength (kN, n = 5) | 0     | 0.316 | 0.294 | 0.229 | 0.227 | 0.209 | 0.202 |
| Standard error (kN)                                  | -     | 0.023 | 0.013 | 0.013 | 0.011 | 0.015 | 0.016 |
| Binder content (%-wt of stone shots)                 | 0     | 2.59  | 2.60  | 2.69  | 2.67  | 2.63  | 2.53  |

These data are shown in the figures below.

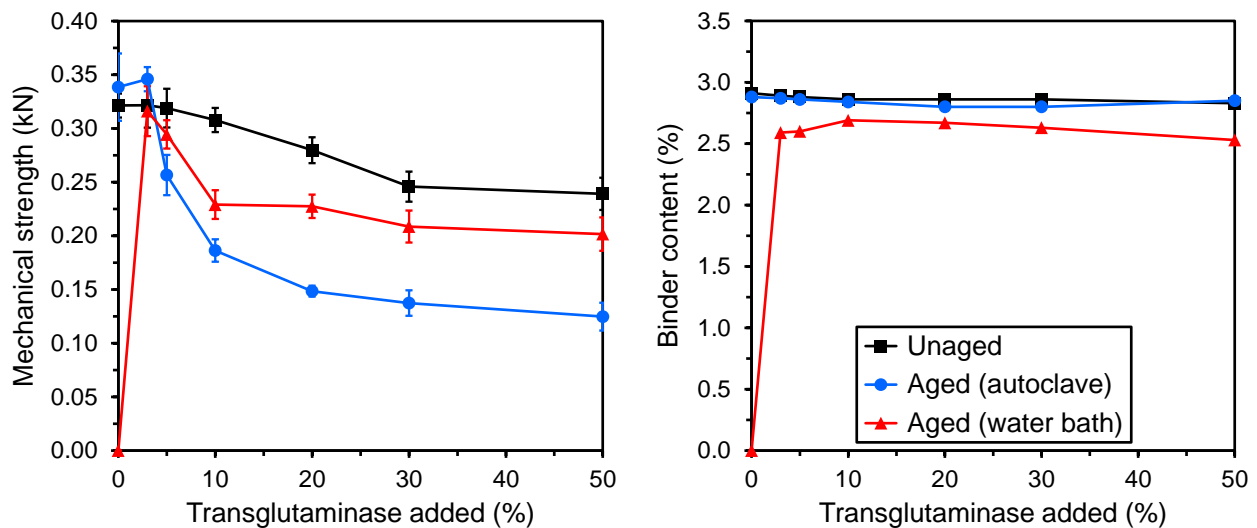

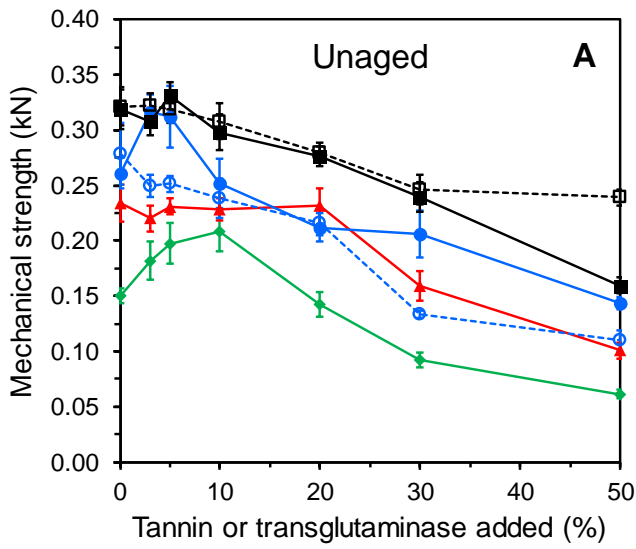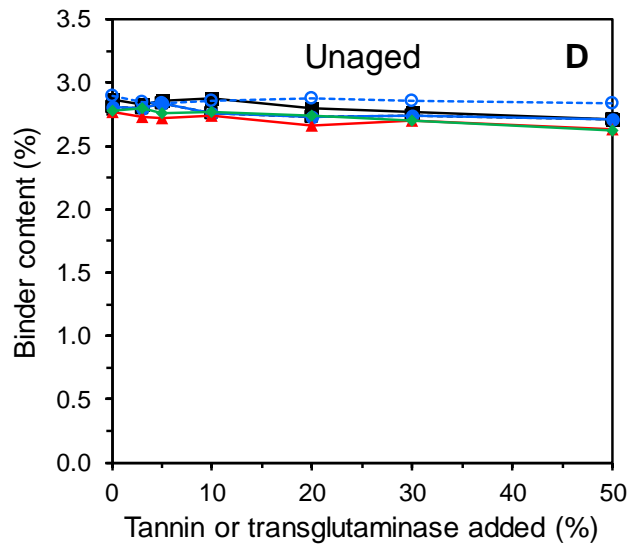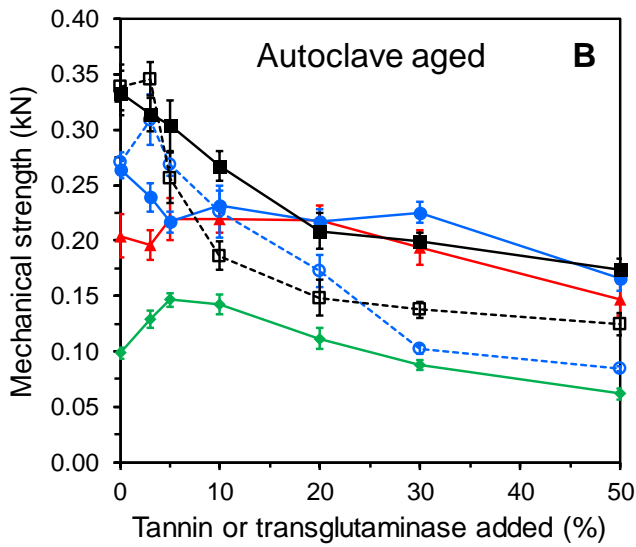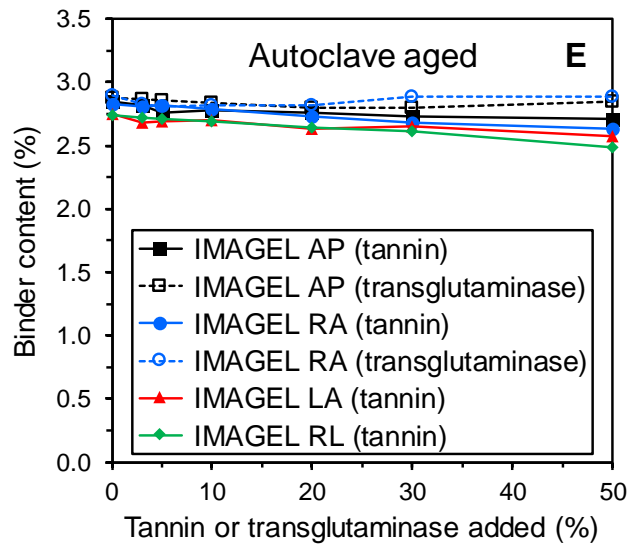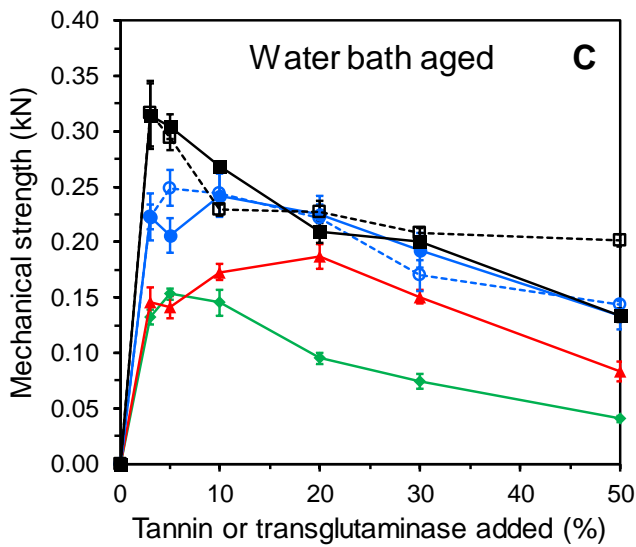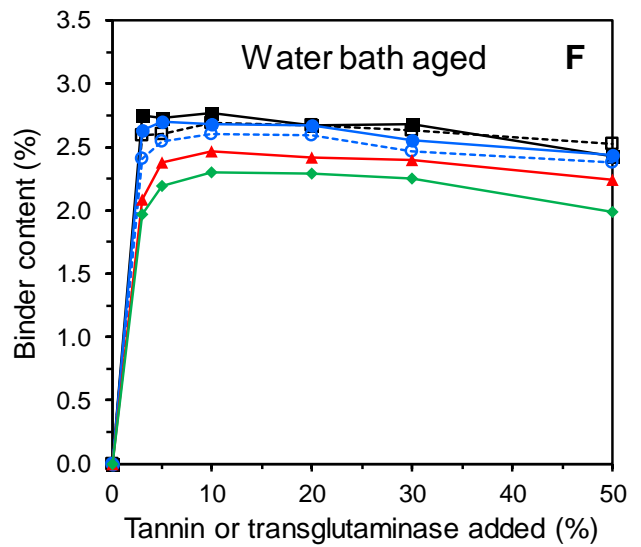

Large versions of Figure 3A-C

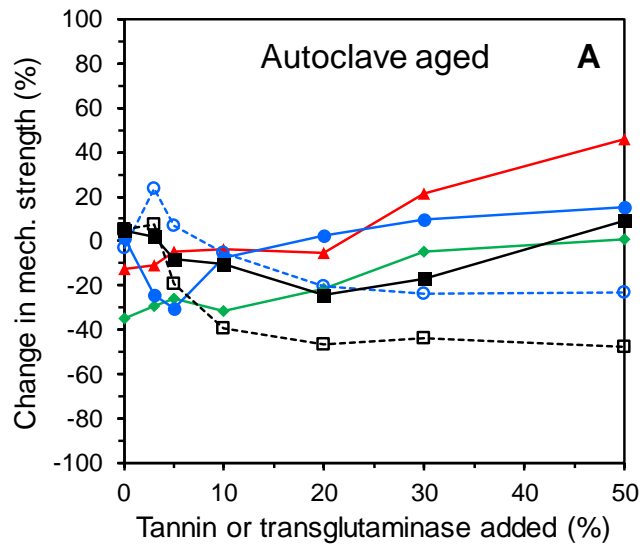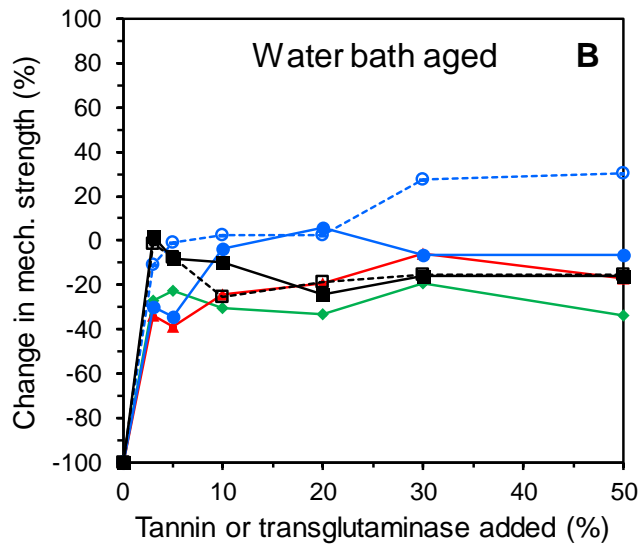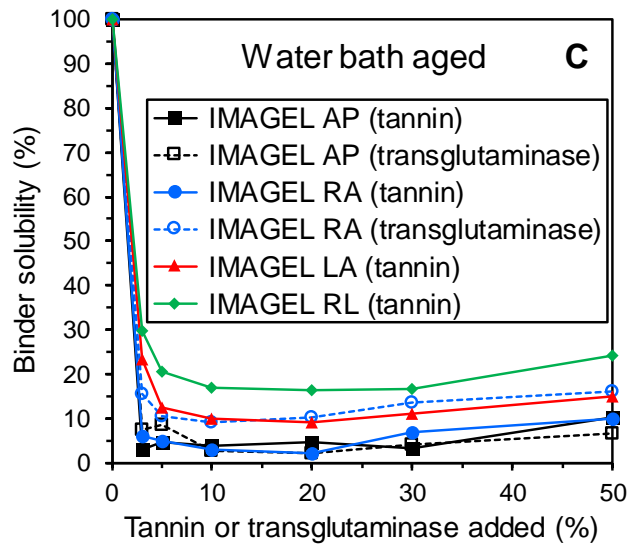

Figure 4, top left: SEM image with view field of 4.15 mm of break surface of composite bar produced using IMAGEL® LA modified with chestnut tree tannin and sodium hydroxide.

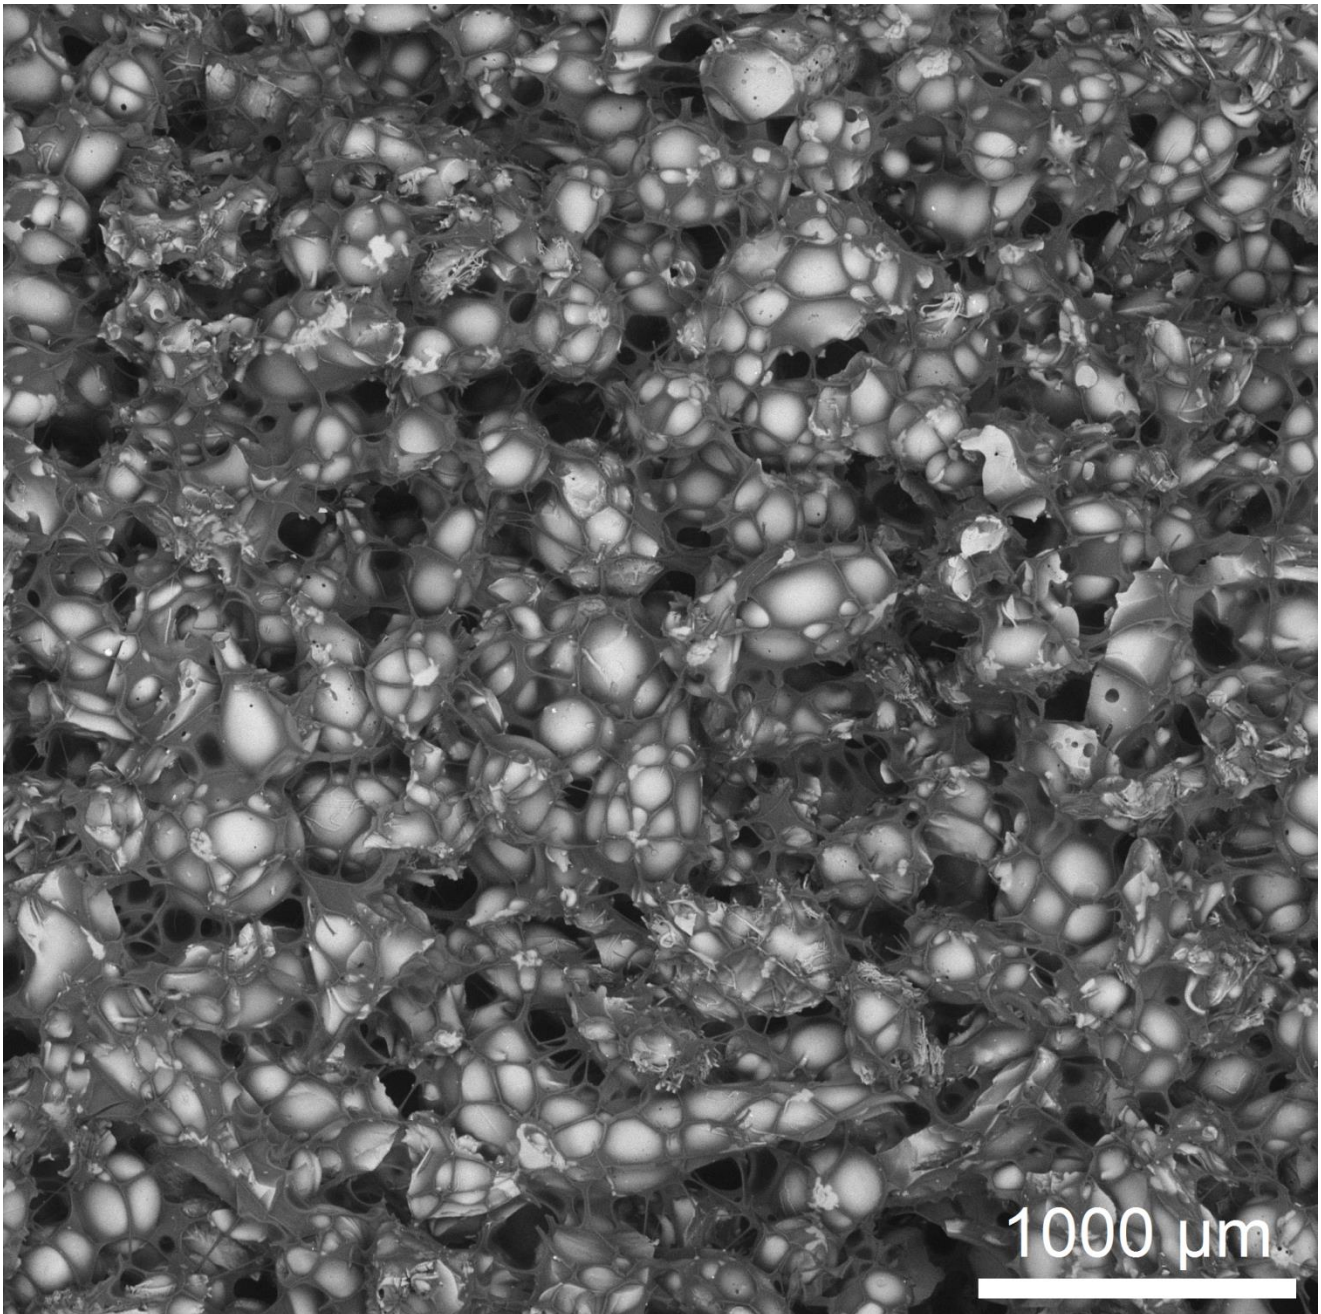



Figure 4, top right: SEM image with view field of 4.15 mm of break surface of composite bar produced using IMAGEL® RA modified with transglutaminase.

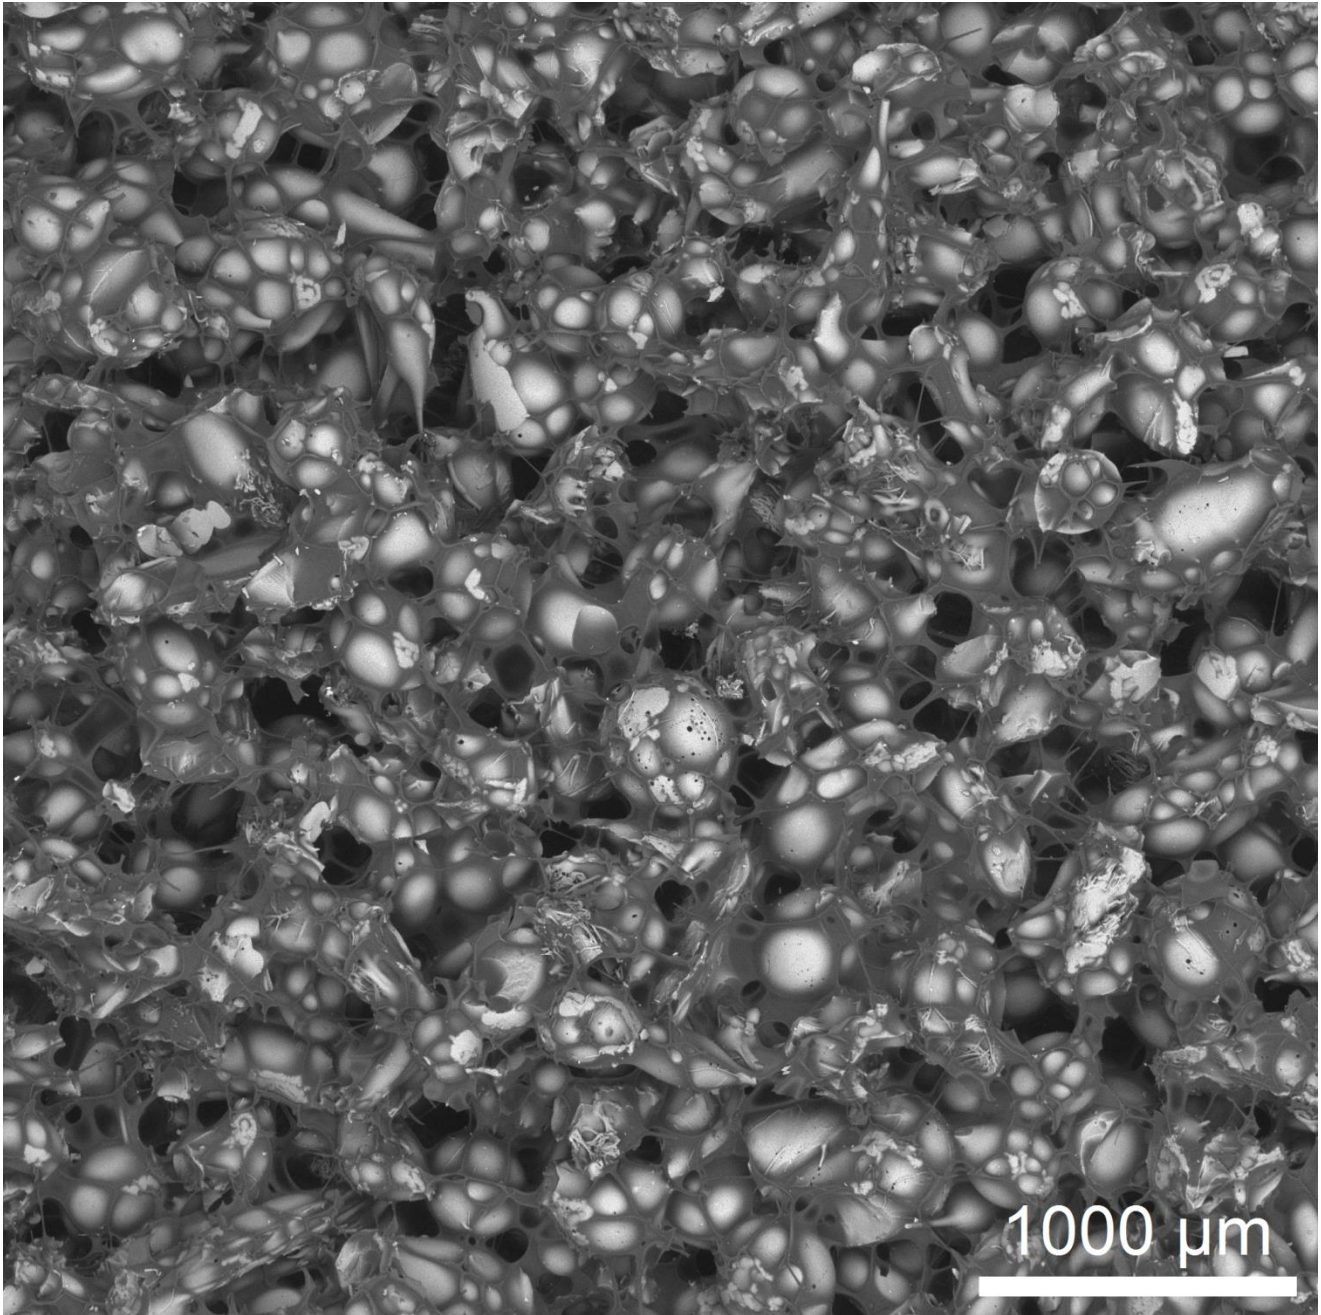

Figure 4, bottom left: SEM image with view field of 4.15 mm of break surface of composite bar produced using a conventional phenol-urea-formaldehyde binder.

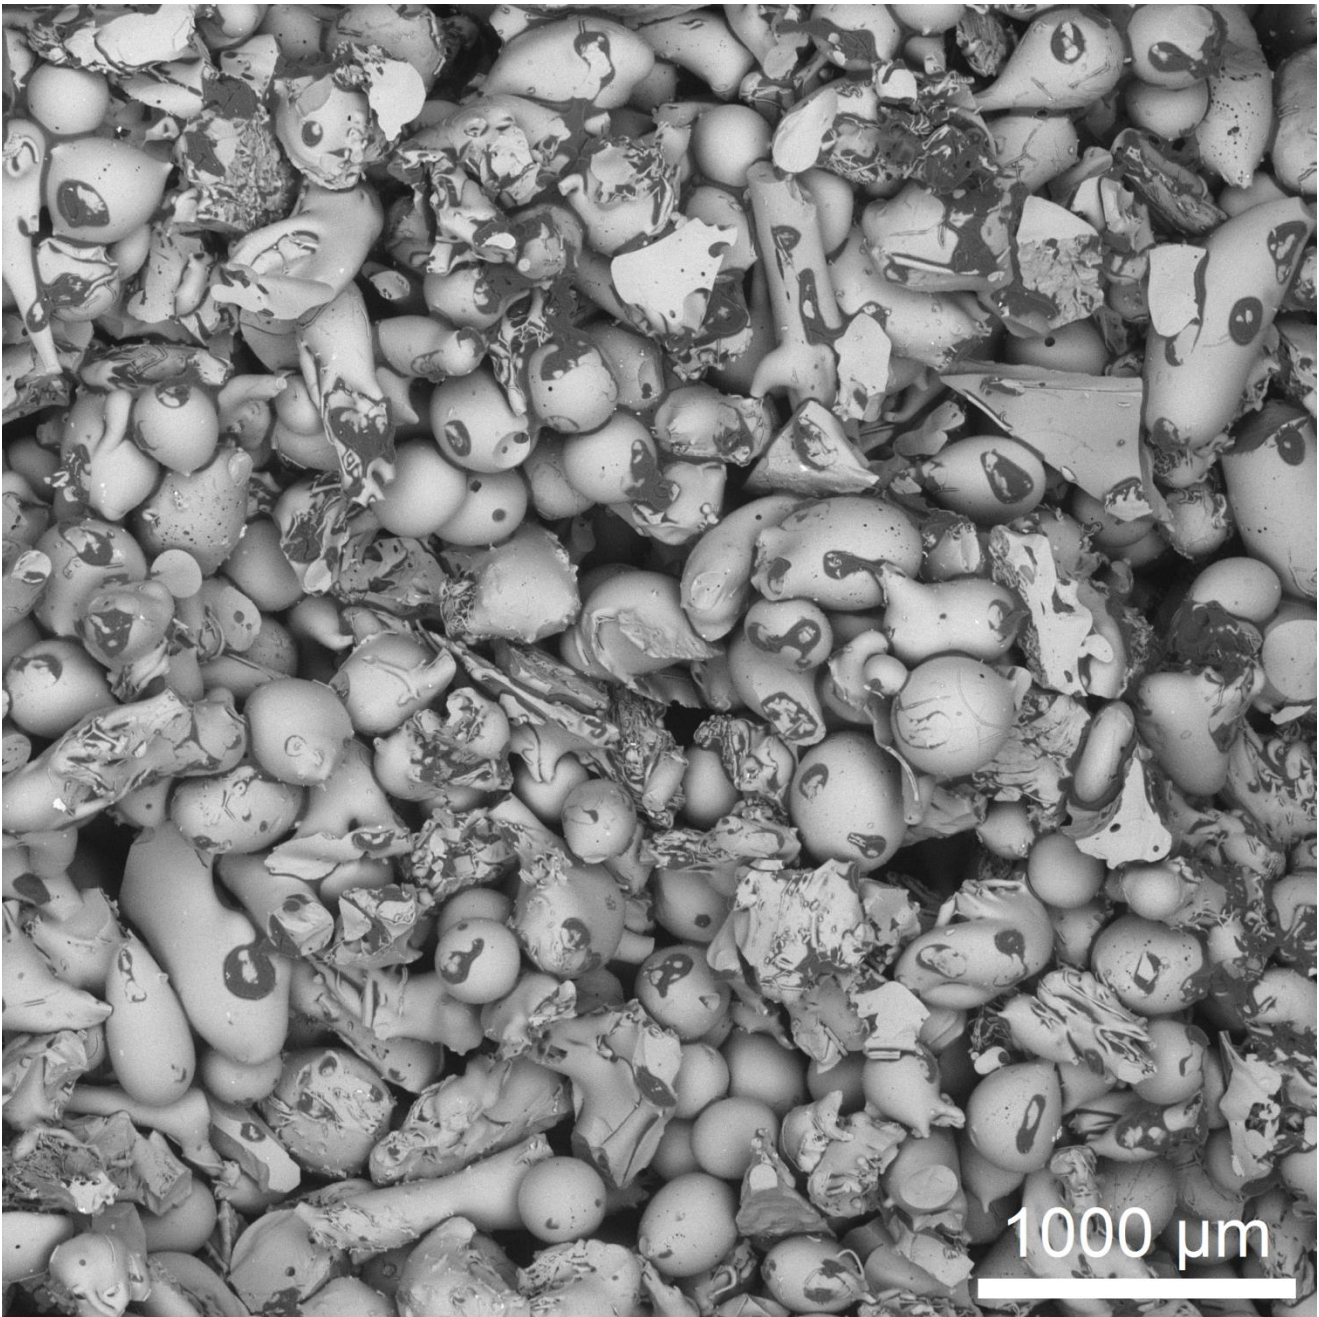

Figure 4, bottom right: SEM image with view field of 4.15 mm of binder-free stone shots.

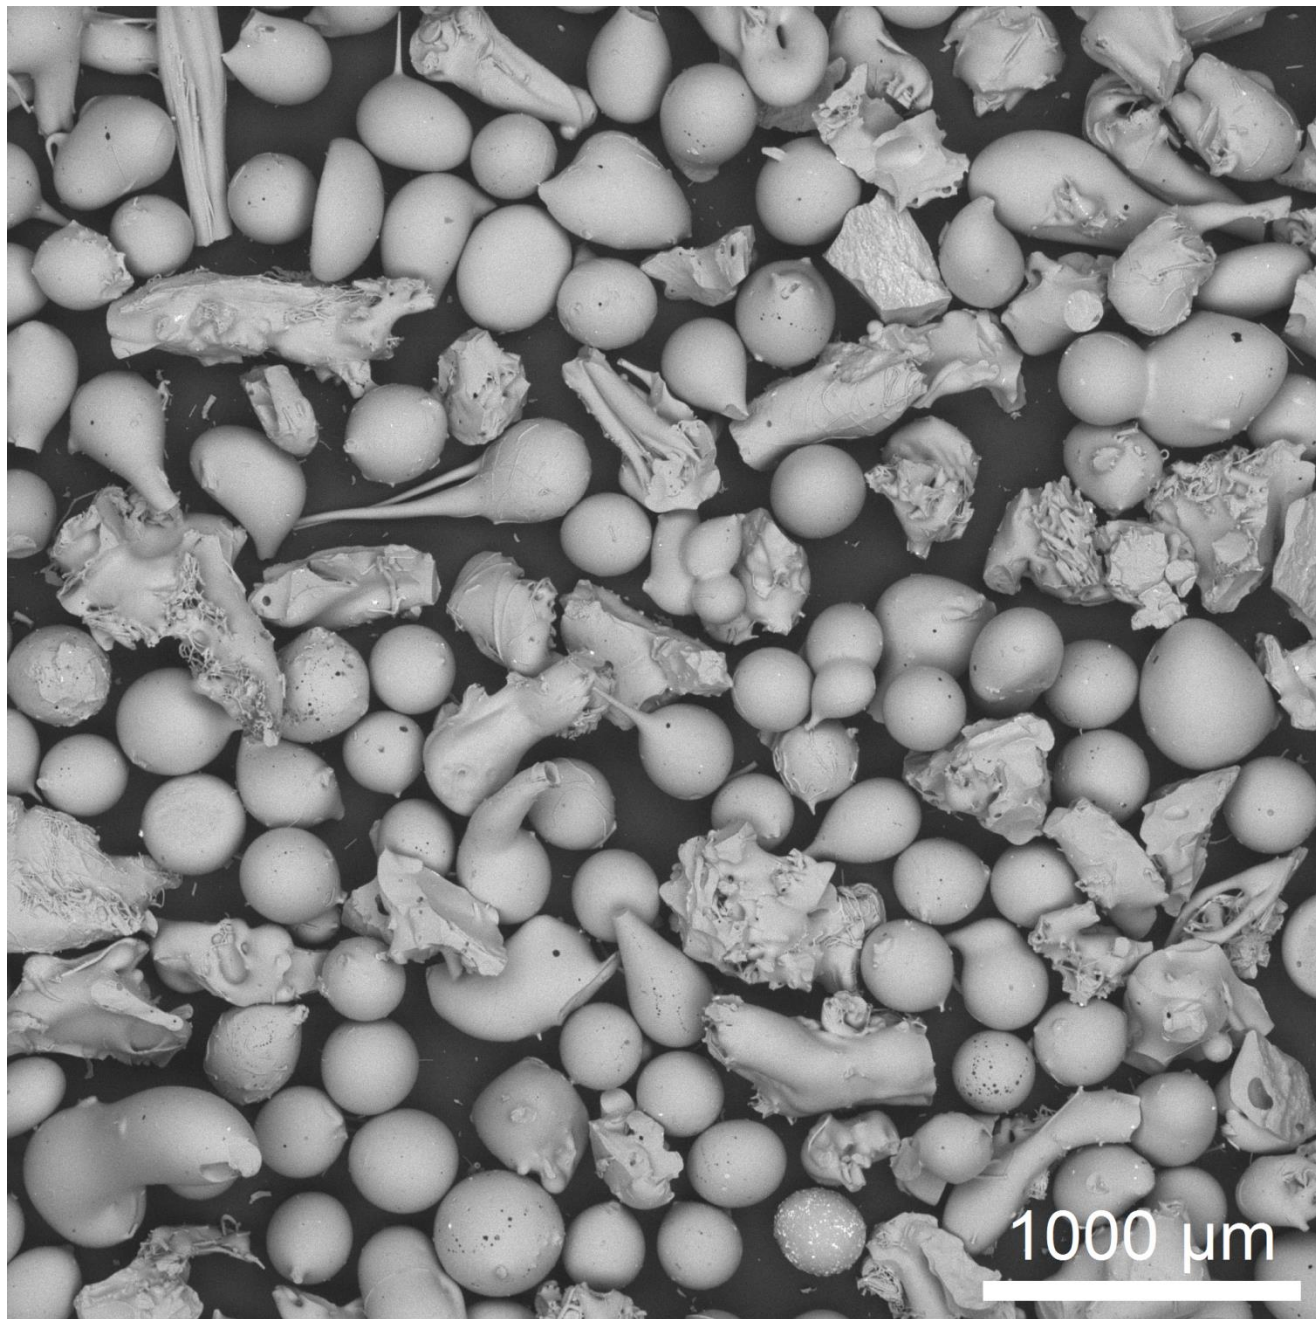

Figure 5, left: SEM image with view field of 1.38 mm of break surface of composite bar produced using IMAGEL® LA modified with chestnut tree tannin and sodium hydroxide.

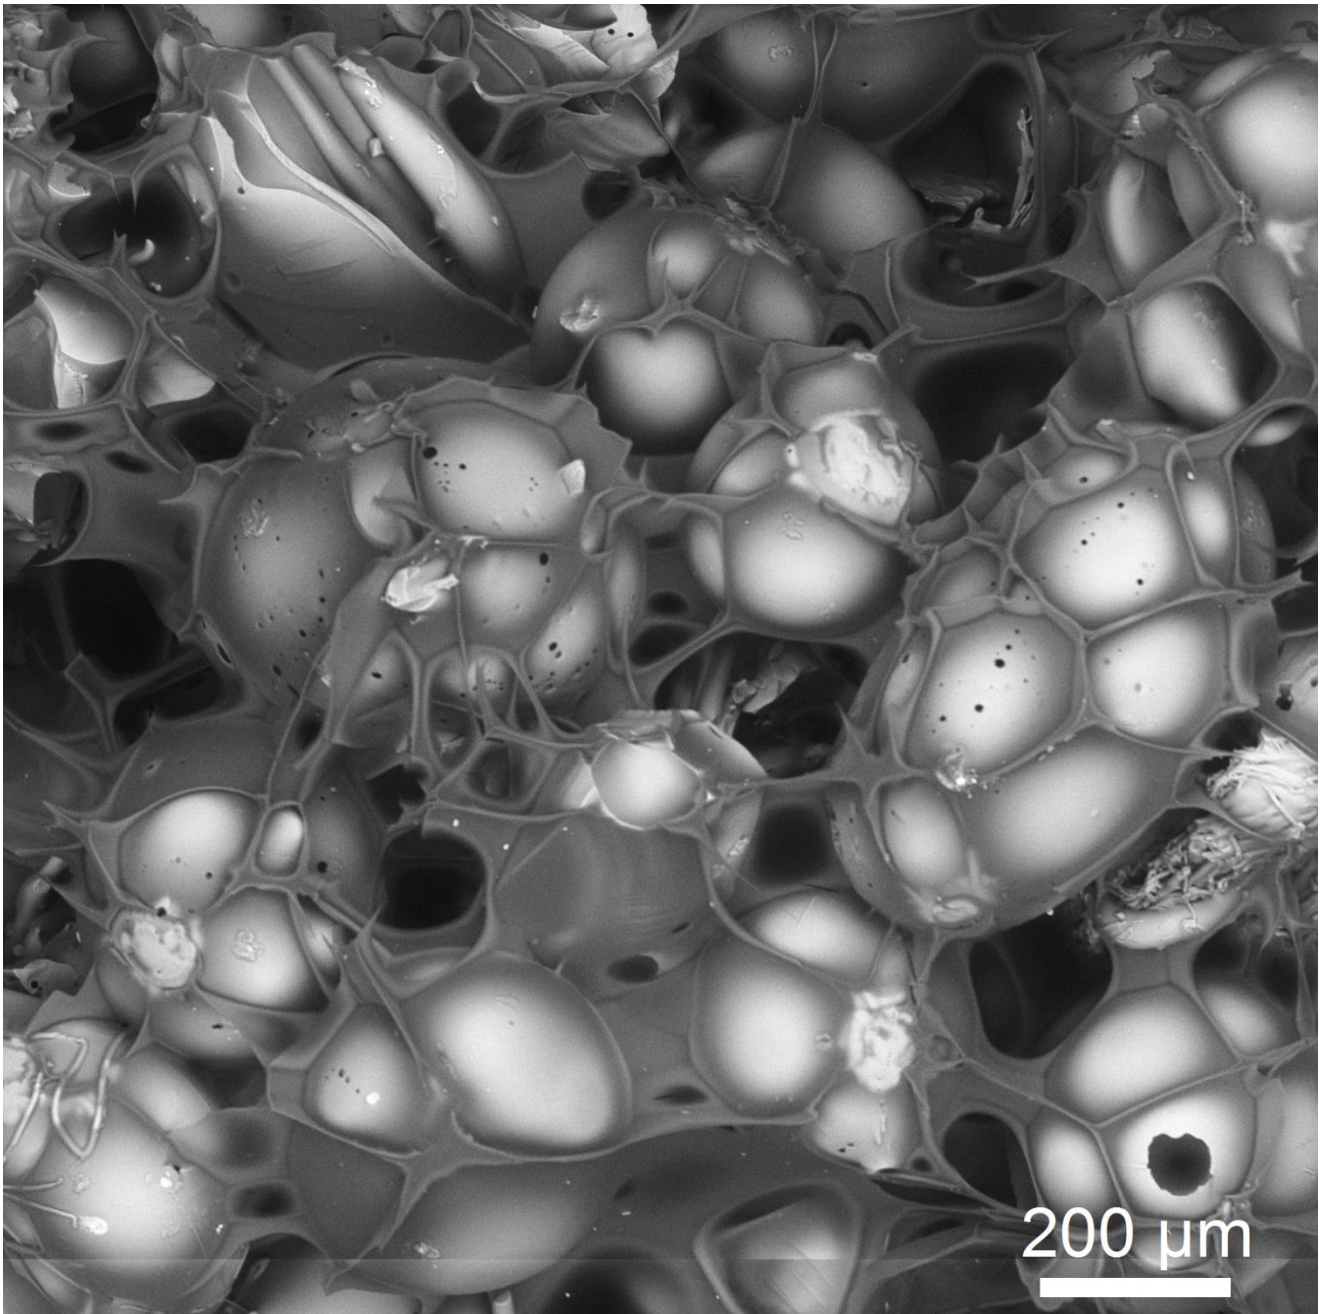

Figure 5, right: SEM image with view field of 1.38 mm of break surface of composite bar produced using IMAGEL® RA modified with transglutaminase.

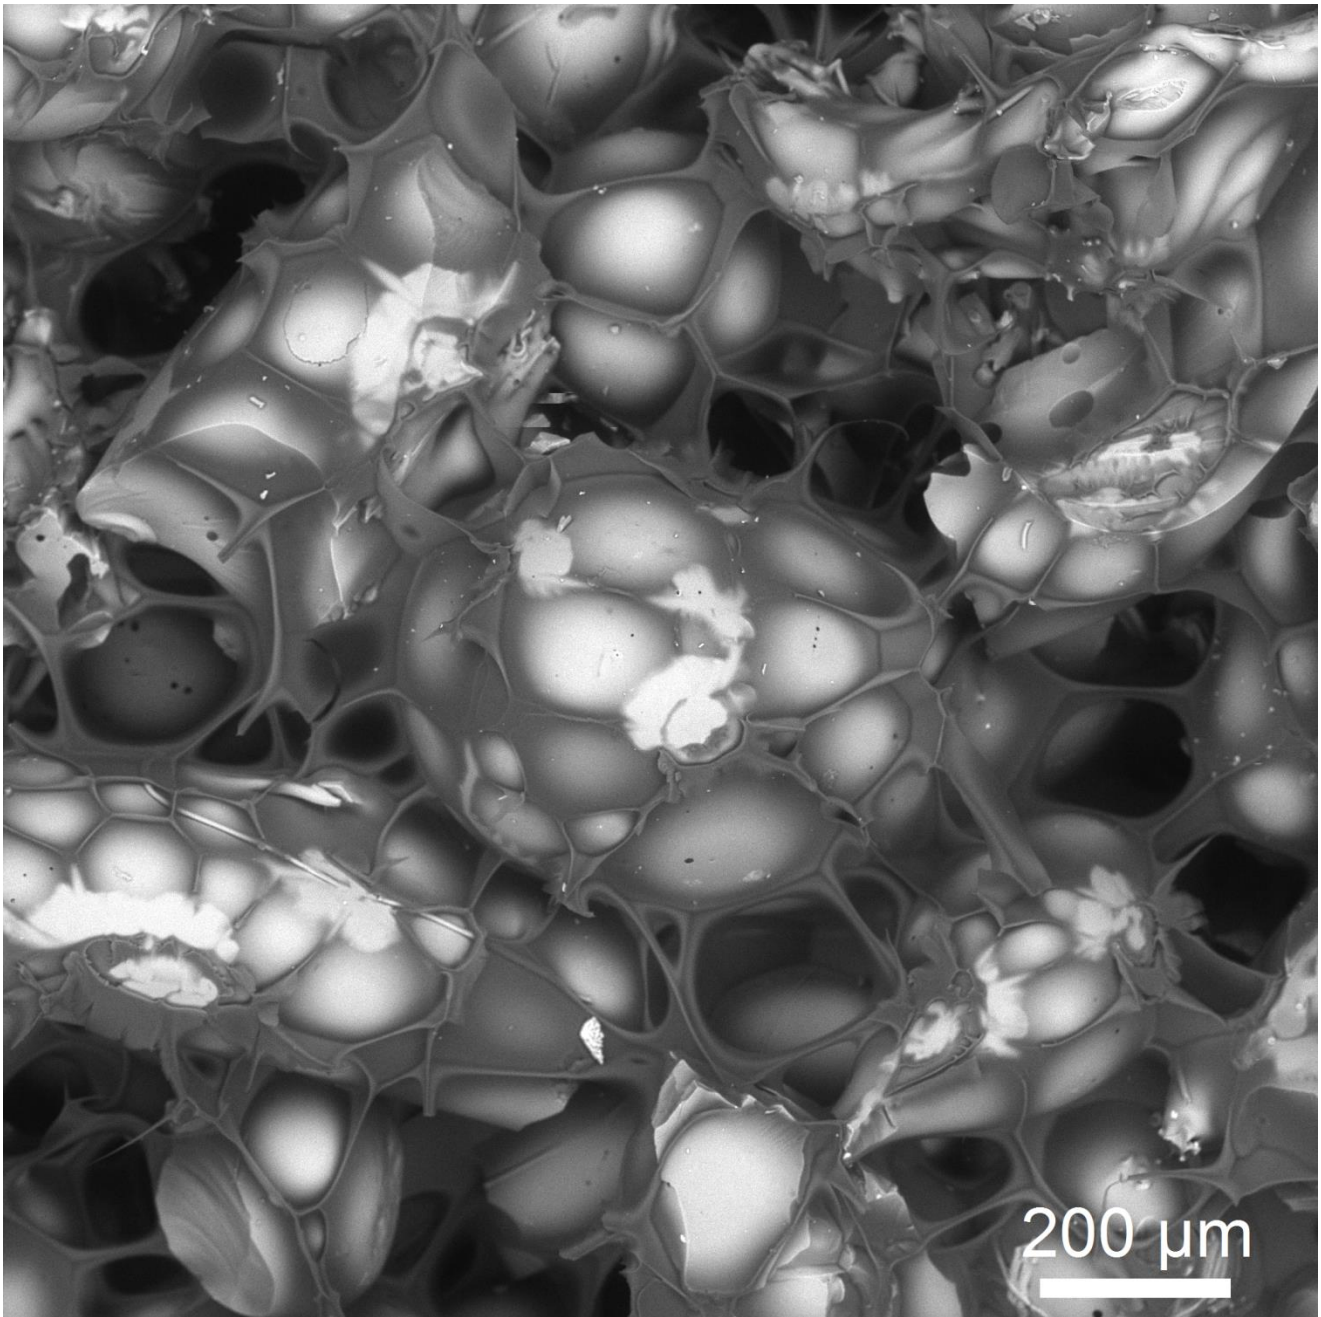

Table of contents entry, right: SEM image with view field of 0.93 mm of gold coated break surface of composite bar produced using IMAGEL® LA modified with chestnut tree tannin and sodium hydroxide.

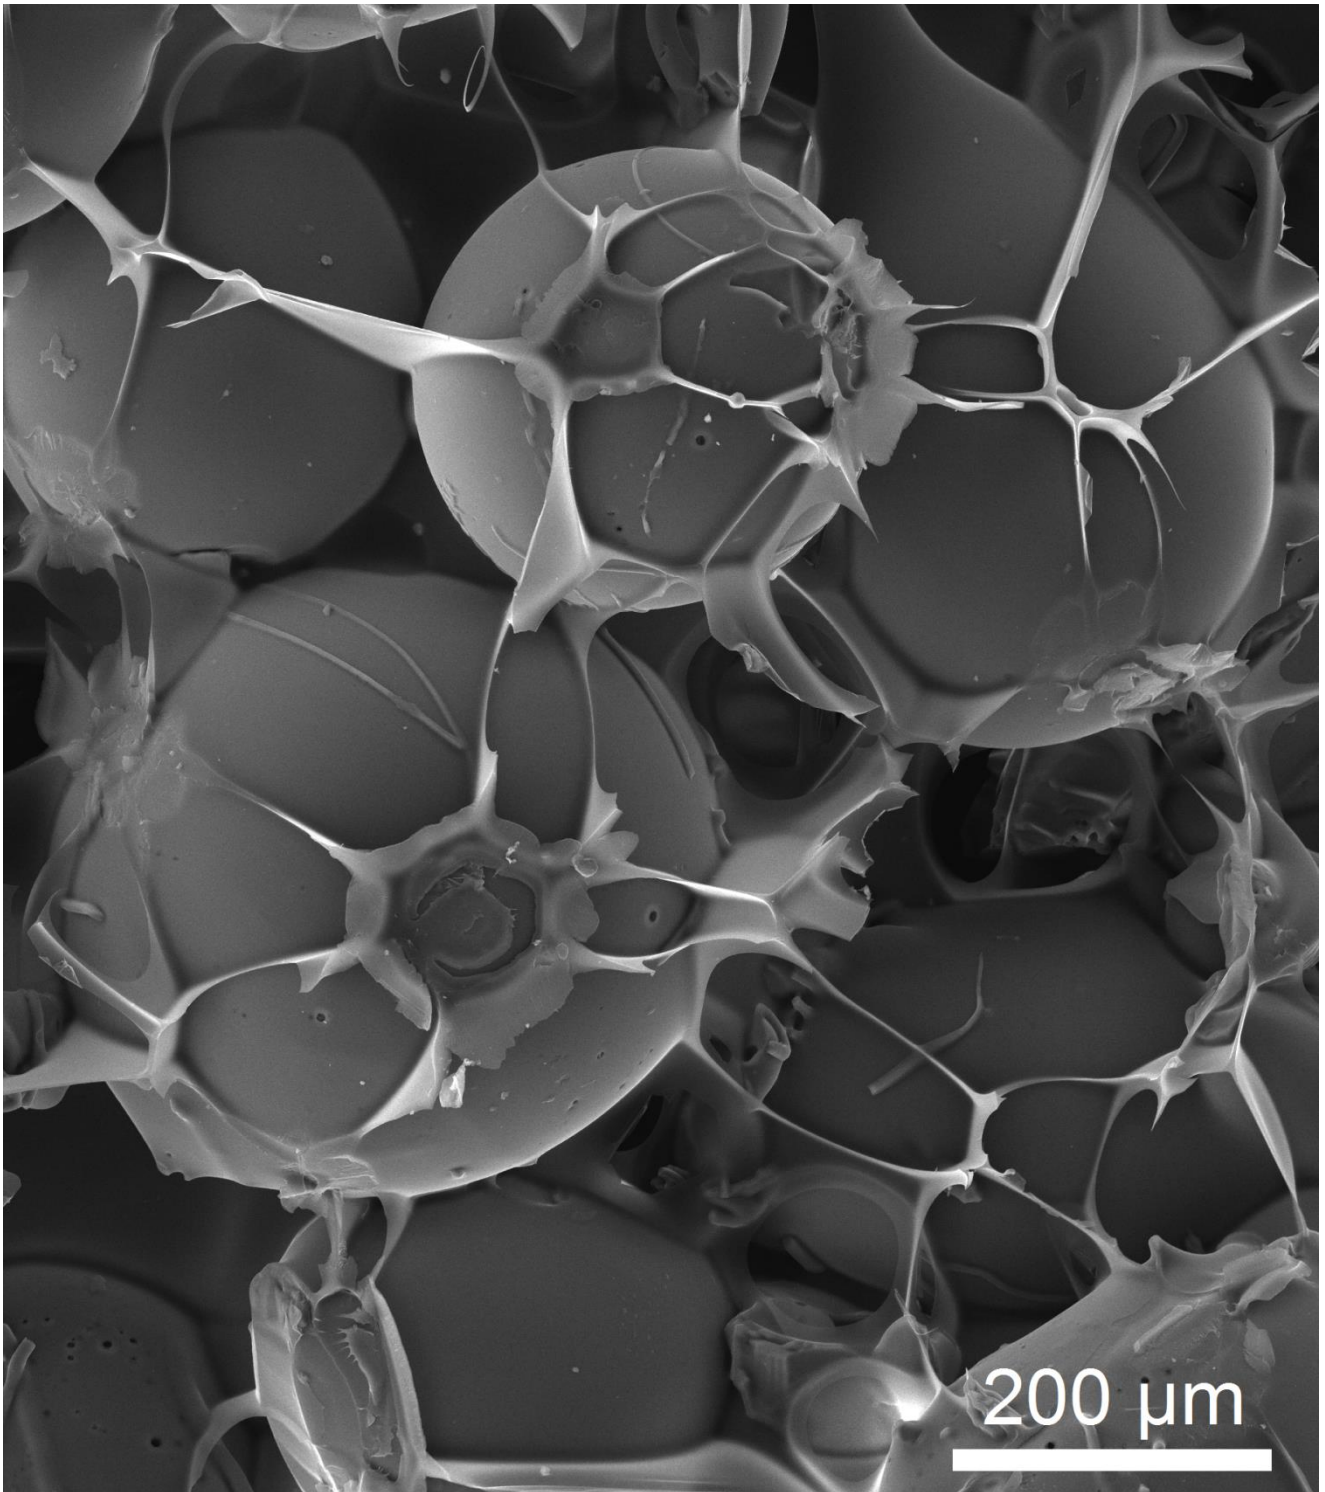

Supplement: c8gc02021c1.pdf [file c8gc02021c1.pdf]
